# Supplementary material for: Identification of a crenarchaeal orthologue of Elf1: implications for chromatin and transcription in Archaea
Source: Springer Nature journal article supplement (doi:10.1186/1745-6150-4-24), 2009-07-29
Supplement: Additional file 1 [file 1745-6150-4-24-s1.pdf]

# **SUPPLEMENTAL MATERIAL**

**FOR**

**Discovery note**

## **Identification of a crenarchaeal orthologue of Elf1: implications for chromatin and transcription in Archaea**

Jan-Peter Daniels<sup>1</sup>, Steven Kelly<sup>1,2,3</sup>, Bill Wickstead<sup>1</sup> and Keith Gull<sup>1,\*</sup>

1) Sir William Dunn School of Pathology  
University of Oxford  
South Parks Road  
OX1 3RE Oxford, UK

2) Centre for Mathematical Biology  
University of Oxford  
24-29 St Giles'  
OX1 3LB Oxford, UK

3) Oxford Centre for Interactive Systems Biology  
Department of Biochemistry  
University of Oxford  
South Parks Road  
OX1 3QU Oxford, UK

\*) corresponding author  
email: keith.gull@path.ox.ac.uk  
phone: 0044 (0) 1865 285455  
fax: 0044 (0) 1865 275501

**Suppl. Figure 1:** Comparison of the Pfam profile-hidden Markov model (HMM) for Elf1 (PF05129.5; x-axis) and the Elf1 HMM used in this study (y-axis). Elf1 homologues identified in this study (red) and non-Elf1 sequences (black) are indicated. The histograms show the distribution of E-values of the sequences for both searches.

**Suppl. Figure 2:** Alignment of archaeal histones. The N- and C-termini of the alignment were trimmed. NCBI/Genbank accession numbers are displayed on the left. *Thermofilum pendens*, *Caldivirga maquilingsensis* and Candidatus *Korarchaeum cryptofilum* sequences are marked with a yellow bar. Residues that are identical or similar to the consensus are shown with a blue or cyan background, respectively.

**Suppl. Table 1:** Sources of archaean predicted proteomes used in this study.

**Suppl. Table 2:** Sources of eukaryotic predicted proteomes used in this study.

**Suppl. Table 3:** Accession numbers of archaean Elf1 orthologues.

**Suppl. Table 4:** Accession numbers and predicted proteome IDs of eukaryotic Elf1 orthologues.

**Suppl. Table 5:** Sources of genomes (DNA sequence) used in this study.

# Suppl. Figure 1

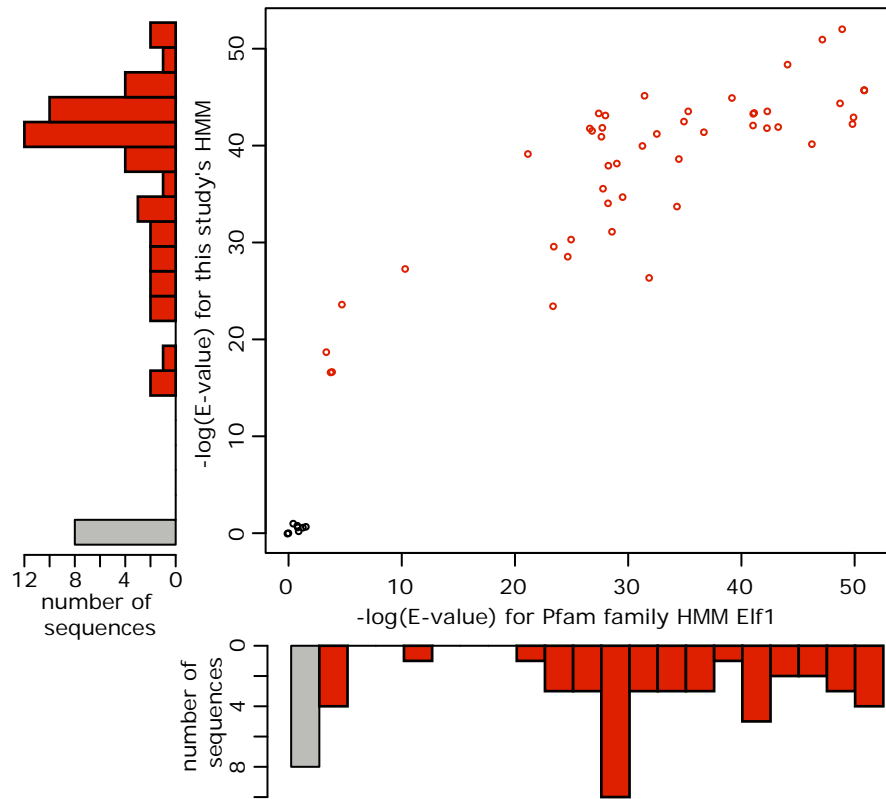



**Suppl. Table 1:** Sources of archaean predicted proteomes used in this study.

| Organism                                      | Source <sup>1</sup>                                                                             | Version | Web reference                                                     |
|-----------------------------------------------|-------------------------------------------------------------------------------------------------|---------|-------------------------------------------------------------------|
| <i>Aeropyrum pernix</i>                       | Biotechnology Center                                                                            | v1.0    | <a href="http://www.tigr.org/">http://www.tigr.org/</a>           |
| <i>Archaeoglobus fulgidus</i>                 | TIGR & UIUC                                                                                     | v1.0    | <a href="http://www.tigr.org/">http://www.tigr.org/</a>           |
| <i>Caldivirga maquilingensis</i>              | US DOE JGI                                                                                      | v1.0    | <a href="http://www.jgi.doe.gov/">http://www.jgi.doe.gov/</a>     |
| Candidatus <i>Korarchaeum cryptofilum</i>     | US DOE JGI                                                                                      | -       | <a href="http://www.jgi.doe.gov/">http://www.jgi.doe.gov/</a>     |
| Candidatus <i>Methanoregula boonei</i>        | US DOE JGI                                                                                      | -       | <a href="http://www.jgi.doe.gov/">http://www.jgi.doe.gov/</a>     |
| <i>Cenarchaeum symbiosum</i>                  | MBARI                                                                                           | -       | <a href="http://www.ebi.ac.uk/">http://www.ebi.ac.uk/</a>         |
| <i>Ferroplasma acidarmanus</i>                | US DOE JGI                                                                                      | -       | <a href="http://www.jgi.doe.gov/">http://www.jgi.doe.gov/</a>     |
| <i>Haloarcula marismortui</i>                 | UMBI/COMB                                                                                       | v16.0   | <a href="http://www.tigr.org/">http://www.tigr.org/</a>           |
| <i>Halobacterium sp.</i>                      | University of Massachusetts-Amherst, University of Washington and Institute for Systems Biology | v1.0    | <a href="http://www.tigr.org/">http://www.tigr.org/</a>           |
| <i>Haloquadratum walsbyi</i>                  | Max Planck Institute                                                                            | v21.0   | <a href="http://www.tigr.org/">http://www.tigr.org/</a>           |
| <i>Halorubrum lacusprofundi</i>               | US DOE JGI                                                                                      | -       | <a href="http://www.jgi.doe.gov/">http://www.jgi.doe.gov/</a>     |
| <i>Ignicoccus hospitalis</i>                  | US DOE JGI                                                                                      | -       | <a href="http://www.jgi.doe.gov/">http://www.jgi.doe.gov/</a>     |
| <i>Metallosphaera sedula</i>                  | US DOE JGI                                                                                      | -       | <a href="http://www.jgi.doe.gov/">http://www.jgi.doe.gov/</a>     |
| <i>Methanothermobacter thermautotrophicus</i> | Genome Therapeutics/Ohio State University                                                       | v1.0    | <a href="http://www.tigr.org/">http://www.tigr.org/</a>           |
| <i>Methanococcoides burtonii</i>              | US DOE JGI                                                                                      | -       | <a href="http://www.jgi.doe.gov/">http://www.jgi.doe.gov/</a>     |
| <i>Methanococcus aeolicus</i>                 | US DOE JGI                                                                                      | -       | <a href="http://www.jgi.doe.gov/">http://www.jgi.doe.gov/</a>     |
| <i>Methanocaldococcus jannaschii</i>          | TIGR & UIUC                                                                                     | v1.0    | <a href="http://www.tigr.org/">http://www.tigr.org/</a>           |
| <i>Methanococcus maripaludis</i>              | US DOE JGI                                                                                      | -       | <a href="http://www.jgi.doe.gov/">http://www.jgi.doe.gov/</a>     |
| <i>Methanococcus voltae</i>                   | US DOE JGI                                                                                      | -       | <a href="http://www.jgi.doe.gov/">http://www.jgi.doe.gov/</a>     |
| <i>Methanocorpusculum labreanum</i>           | US DOE JGI                                                                                      | -       | <a href="http://www.jgi.doe.gov/">http://www.jgi.doe.gov/</a>     |
| <i>Methanoculleus marisnigri</i>              | US DOE JGI                                                                                      | -       | <a href="http://www.jgi.doe.gov/">http://www.jgi.doe.gov/</a>     |
| <i>Methanopyrus kandleri</i>                  | Fidelity Systems, Inc.                                                                          | v8.0    | <a href="http://www.tigr.org/">http://www.tigr.org/</a>           |
| <i>Methanosaeta thermophila</i>               | US DOE JGI                                                                                      | -       | <a href="http://www.jgi.doe.gov/">http://www.jgi.doe.gov/</a>     |
| <i>Methanosarcina acetivorans</i>             | Broad institute                                                                                 | -       | <a href="http://www.broad.mit.edu/">http://www.broad.mit.edu/</a> |
| <i>Methanosarcina barkeri</i>                 | US DOE JGI                                                                                      | -       | <a href="http://www.jgi.doe.gov/">http://www.jgi.doe.gov/</a>     |
| <i>Methanosarcina mazei</i>                   | Goettingen Genomics Laboratory /Integrated Genomics Inc.                                        | v8.0    | <a href="http://www.tigr.org/">http://www.tigr.org/</a>           |
| <i>Methanosphaera stadtmanae</i>              | Goettingen Genomics Laboratory Max-Planck-Institute, Marburg                                    | v20.0   | <a href="http://www.tigr.org/">http://www.tigr.org/</a>           |
| <i>Methanospirillum hungatei</i>              | US DOE JGI                                                                                      | -       | <a href="http://www.jgi.doe.gov/">http://www.jgi.doe.gov/</a>     |
| <i>Nanoarchaeum equitans</i>                  | Diversa                                                                                         | v15.0   | <a href="http://www.tigr.org/">http://www.tigr.org/</a>           |
| <i>Natronomonas pharaonis</i>                 | Max-Planck-Institute                                                                            | v18.0   | <a href="http://www.tigr.org/">http://www.tigr.org/</a>           |
| <i>Nitrosopumilus maritimus</i>               | US DOE JGI                                                                                      | -       | <a href="http://www.jgi.doe.gov/">http://www.jgi.doe.gov/</a>     |
| <i>Picrophilus torridus</i>                   | University of Goettingen/TU Hamburg-Harburg/Georg-August-Univ Goettingen                        | v16.0   | <a href="http://www.tigr.org/">http://www.tigr.org/</a>           |
| <i>Pyrobaculum aerophilum</i>                 | Caltech/UCLA                                                                                    | v7.0    | <a href="http://www.tigr.org/">http://www.tigr.org/</a>           |
| <i>Pyrobaculum arsenaticum</i>                | US DOE JGI                                                                                      | -       | <a href="http://www.jgi.doe.gov/">http://www.jgi.doe.gov/</a>     |
| <i>Pyrobaculum calidifontis</i>               | US DOE JGI                                                                                      | -       | <a href="http://www.jgi.doe.gov/">http://www.jgi.doe.gov/</a>     |
| <i>Pyrobaculum islandicum</i>                 | US DOE JGI                                                                                      | -       | <a href="http://www.jgi.doe.gov/">http://www.jgi.doe.gov/</a>     |
| <i>Pyrococcus abyssi</i>                      | Genoscope                                                                                       | v1.0    | <a href="http://www.tigr.org/">http://www.tigr.org/</a>           |
| <i>Pyrococcus furiosus</i>                    | Univ of Utah/Univ of Maryland                                                                   | v7.0    | <a href="http://www.tigr.org/">http://www.tigr.org/</a>           |
| <i>Pyrococcus horikoshii</i>                  | MITI & Univ of Tokyo                                                                            | v1.0    | <a href="http://www.tigr.org/">http://www.tigr.org/</a>           |
| <i>Staphylothermus marinus</i>                | US DOE JGI                                                                                      | -       | <a href="http://www.jgi.doe.gov/">http://www.jgi.doe.gov/</a>     |
| <i>Sulfolobus acidocaldarius</i>              | Epidauros Biotechnologie AG Univ of Copenhagen                                                  | v20.0   | <a href="http://www.tigr.org/">http://www.tigr.org/</a>           |
| <i>Sulfolobus solfataricus</i>                | European Union/Canadian Bioinformatics Resource                                                 | v3.0    | <a href="http://www.tigr.org/">http://www.tigr.org/</a>           |
| <i>Sulfolobus tokodaii</i>                    | Biotechnology Center                                                                            | v7.0    | <a href="http://www.tigr.org/">http://www.tigr.org/</a>           |
| <i>Thermococcus kodakaraensis</i>             | Kyoto University/Kwansei Gakuin University                                                      | v17.0   | <a href="http://www.tigr.org/">http://www.tigr.org/</a>           |
| <i>Thermofilum pendens</i>                    | US DOE JGI                                                                                      | -       | <a href="http://www.jgi.doe.gov/">http://www.jgi.doe.gov/</a>     |
| <i>Thermoplasma acidophilum</i>               | Max Planck Institute for Biochemistry                                                           | v1.0    | <a href="http://www.tigr.org/">http://www.tigr.org/</a>           |
| <i>Thermoplasma volcanium</i>                 | AIST                                                                                            | v1.0    | <a href="http://www.tigr.org/">http://www.tigr.org/</a>           |
| <i>Thermoproteus neutrophilus</i>             | US DOE JGI                                                                                      | -       | <a href="http://www.jgi.doe.gov/">http://www.jgi.doe.gov/</a>     |

<sup>1</sup>) Source of data does not necessarily correlate with sequencing centre(s). See individual projects for full acknowledgements of participants.

**Suppl. Table 2:** Sources of eukaryotic predicted proteomes used in this study.

| <b>Organism</b>                  | <b>Source<sup>1</sup></b> | <b>Version</b>  | <b>Web reference</b>                                                                                             |
|----------------------------------|---------------------------|-----------------|------------------------------------------------------------------------------------------------------------------|
| <i>Arabidopsis thaliana</i>      | TAIR                      | TAIR7           | <a href="http://www.arabidopsis.org/">www.arabidopsis.org/</a>                                                   |
| <i>Caenorhabditis elegans</i>    | WormBase                  | WS179           | <a href="http://www.sanger.ac.uk/Projects/C_elegans/WORMBASE/">www.sanger.ac.uk/Projects/C_elegans/WORMBASE/</a> |
| <i>Chlamydomonas reinhardtii</i> | US DOE JGI                | v3.0            | <a href="http://www.jgi.doe.gov/">www.jgi.doe.gov/</a>                                                           |
| <i>Cryptosporidium parvum</i>    | CryptoDB                  | v3.4            | <a href="http://www.cryptodb.org/">www.cryptodb.org/</a>                                                         |
| <i>Cyanidioschyzon merolae</i>   | C.merolae genome project  | -               | <a href="http://merolae.biol.s.u-tokyo.ac.jp/">merolae.biol.s.u-tokyo.ac.jp/</a>                                 |
| <i>Dictyostelium discoideum</i>  | dictyBase                 | 05-20-2007      | <a href="http://dictybase.org/">dictybase.org/</a>                                                               |
| <i>Drosophila melanogaster</i>   | ENSEMBL                   | BDGP4.3, 46.43b | <a href="http://www.ensembl.org/info/data/">www.ensembl.org/info/data/</a>                                       |
| <i>Entamoeba histolytica</i>     | geneDB                    | 17102005        | <a href="http://www.genedb.org/">www.genedb.org/</a>                                                             |
| <i>Giardia lamblia</i>           | GiardiaDB                 | April 17, 2007  | <a href="http://www.mbl.edu/Giardia">www.mbl.edu/Giardia</a>                                                     |
| <i>Homo sapiens</i>              | VEGA                      | Jun2006         | <a href="http://vega.sanger.ac.uk/">vega.sanger.ac.uk/</a>                                                       |
| <i>Leishmania major</i>          | geneDB                    | v5.2            | <a href="http://www.genedb.org/">www.genedb.org/</a>                                                             |
| <i>Monosiga brevicollis</i>      | JGI                       | v1.0            | <a href="http://www.jgi.doe.gov/">www.jgi.doe.gov/</a>                                                           |
| <i>Naegleria gruberi</i>         | JGI                       | v1.0            | <a href="http://www.jgi.doe.gov/">www.jgi.doe.gov/</a>                                                           |
| <i>Paramecium tetraurelia</i>    | ParameciumDB              | v1.11           | <a href="http://paramecium.cgm.cnrs-gif.fr/">paramecium.cgm.cnrs-gif.fr/</a>                                     |
| <i>Phaeodactylum tricornutum</i> | JGI                       | v2.0            | <a href="http://www.jgi.doe.gov/">www.jgi.doe.gov/</a>                                                           |
| <i>Physcomitrella patens</i>     | US DOE JGI                | v1.1            | <a href="http://www.jgi.doe.gov/">www.jgi.doe.gov/</a>                                                           |
| <i>Phytophthora sojae</i>        | US DOE JGI                | v1.1            | <a href="http://www.jgi.doe.gov/">www.jgi.doe.gov/</a>                                                           |
| <i>Phytophthora ramorum</i>      | US DOE JGI                | v1.1            | <a href="http://www.jgi.doe.gov/">www.jgi.doe.gov/</a>                                                           |
| <i>Plasmodium falciparum</i>     | PlasmoDB                  | v5.3            | <a href="http://www.plasmodb.org/">www.plasmodb.org/</a>                                                         |
| <i>Saccharomyces cerevisiae</i>  | ENSEMBL                   | SGD1.01.46      | <a href="http://www.ensembl.org/info/data/">www.ensembl.org/info/data/</a>                                       |
| <i>Schizosaccharomyces pombe</i> | Sanger                    | -               | <a href="http://www.sanger.ac.uk/Projects/S_pombe">www.sanger.ac.uk/Projects/S_pombe</a>                         |
| <i>Takifugu rubripes</i>         | ENSEMBL                   | Assembly4, 46   | <a href="http://www.ensembl.org/info/data/">www.ensembl.org/info/data/</a>                                       |
| <i>Tetrahymena thermophila</i>   | TIGR                      | 10/24/2006      | <a href="http://www.tigr.org/tdb/e2k1/tta1/">www.tigr.org/tdb/e2k1/tta1/</a>                                     |
| <i>Thalassiosira pseudonana</i>  | US DOE JGI                | v3.0            | <a href="http://www.jgi.doe.gov/">www.jgi.doe.gov/</a>                                                           |
| <i>Theileria annulata</i>        | GeneDB                    | v4              | <a href="http://www.genedb.org/">www.genedb.org/</a>                                                             |
| <i>Toxoplasma gondii</i>         | ToxoDB                    | v4.1            | <a href="http://www.toxodb.org/">www.toxodb.org/</a>                                                             |
| <i>Trichomonas vaginalis</i>     | TIGR                      | 20050331        | <a href="http://www.tigr.org/tdb/e2k1/tvg/">www.tigr.org/tdb/e2k1/tvg/</a>                                       |
| <i>Trypanosoma brucei</i>        | geneDB                    | v4              | <a href="http://www.genedb.org/">www.genedb.org/</a>                                                             |

<sup>1</sup>) Source of data does not necessarily correlate with sequencing centre(s). See individual projects for full acknowledgements of participants.

**Suppl. Table 3:** Accession numbers of archaean Elf1 orthologues.

| <b>Organism</b>                           | <b>NCBI/Genbank reference</b> |
|-------------------------------------------|-------------------------------|
| <i>Aeropyrum pernix</i>                   | BAA79593.2                    |
| <i>Caldivirga maquilingensis</i>          | ABW01761.1                    |
| <i>Candidatus Korarchaeum cryptofilum</i> | ACB08272.1                    |
| <i>Ignicoccus hospitalis</i>              | ABU81609.1                    |
| <i>Metallosphaera sedula</i>              | ABP96427.1                    |
| <i>Pyrobaculum aerophilum</i>             | AAL64635.1                    |
| <i>Pyrobaculum arsenaticum</i>            | ABP51345.1                    |
| <i>Pyrobaculum calidifontis</i>           | ABO08409.1                    |
| <i>Pyrobaculum islandicum</i>             | ABL87622.1                    |
| <i>Staphylothermus marinus</i>            | ABN70090.1                    |
| <i>Sulfolobus acidocaldarius</i>          | YP_255398.1                   |
| <i>Sulfolobus solfataricus</i>            | AAK40600.1                    |
| <i>Sulfolobus tokodaii</i>                | BAB65278.1                    |
| <i>Thermofilum pendens</i>                | NA                            |
| <i>Thermoproteus neutrophilus</i>         | ACB40598.1                    |

**Suppl. Table 4:** Accession numbers and predicted proteome IDs of eukaryotic Elf1 orthologues.

| <b>Organism</b>                  | <b>NCBI/Genbank reference</b>                  |
|----------------------------------|------------------------------------------------|
| <i>Arabidopsis thaliana</i>      | NP_568654.1                                    |
| <i>Caenorhabditis elegans</i>    | NP_496983.1                                    |
| <i>Chlamydomonas reinhardtii</i> | XP_001691592.1                                 |
| <i>Cryptosporidium parvum</i>    | XP_626150.1                                    |
| <i>Cyanidioschyzon merolae</i>   | CMO247C                                        |
| <i>Dictyostelium discoideum</i>  | XP_637365.1                                    |
| <i>Drosophila melanogaster</i>   | NP_001104426.1; NP_996099.1                    |
| <i>Giardia lamblia</i>           | XP_001709420.1                                 |
| <i>Homo sapiens</i>              | EAW84230.1; OTTHUMP00000077650                 |
| <i>Leishmania major</i>          | XP_001682840.1; XP_001682841.1                 |
| <i>Naegleria gruberi</i>         | 5729                                           |
| <i>Paramecium tetraurelia</i>    | XP_001346933.1; XP_001458266.1; XP_001450964.1 |
| <i>Phaeodactylum tricornutum</i> | XP_002183971.1                                 |
| <i>Physcomitrella patens</i>     | XP_001765330.1; XP_001763568.1                 |
| <i>Phytophthora sojae</i>        | 158411                                         |
| <i>Phytophthora ramorum</i>      | 93621                                          |
| <i>Plasmodium falciparum</i>     | XP_001352018.1                                 |
| <i>Saccharomyces cerevisiae</i>  | NP_012762.1                                    |
| <i>Schizosaccharomyces pombe</i> | NP_594786.1                                    |
| <i>Takifugu rubripes</i>         | SINFRUP000000161665                            |
| <i>Tetrahymena thermophila</i>   | XP_001030656.1                                 |
| <i>Thalassiosira pseudonana</i>  | XP_002292763.1                                 |
| <i>Theileria annulata</i>        | XP_955243.1                                    |
| <i>Trichomonas vaginalis</i>     | XP_001305861.1                                 |
| <i>Trypanosoma brucei</i>        | XP_001218865.1; XP_001218870.1                 |

**Suppl. Table 5 (part 1 of 3): Sources of genomes (DNA sequence) used in this study.**

| <b>genome/plasmid</b>                              | <b>NCBI</b> | <b>Source</b>                                                 | <b>Web reference</b>                                                                                                                                  |
|----------------------------------------------------|-------------|---------------------------------------------------------------|-------------------------------------------------------------------------------------------------------------------------------------------------------|
| <i>Aeropyrum pernix</i>                            | NC_000854.2 | NITE                                                          | <a href="http://www.bio.nite.go.jp/dogam/MicroTop?GENOME_ID=ape_G1">http://www.bio.nite.go.jp/dogam/MicroTop?GENOME_ID=ape_G1</a>                     |
| <i>Archaeoglobus fulgidus</i>                      | NC_000917.1 | TIGR                                                          | <a href="http://www.tigr.org/tigr-scripts/CMR2/GenomePages3.spl?database=gaf">http://www.tigr.org/tigr-scripts/CMR2/GenomePages3.spl?database=gaf</a> |
| <i>Caldivirga maquilingsensis</i>                  | NC_009954.1 | US DOE Joint Genome Institute                                 | <a href="http://genome.jgi-psf.org/draft_microbes/calma/calma.home.html">http://genome.jgi-psf.org/draft_microbes/calma/calma.home.html</a>           |
| <i>Candidatus Korarchaeum cryptofilum</i>          | NC_010482.1 | US DOE Joint Genome Institute                                 | <a href="http://www.jgi.doe.gov/">http://www.jgi.doe.gov/</a>                                                                                         |
| <i>Candidatus Methanoregula boonei</i>             | NC_009712.1 | US DOE Joint Genome Institute                                 | <a href="http://genome.jgi-psf.org/metbo/metbo.info.html">http://genome.jgi-psf.org/metbo/metbo.info.html</a>                                         |
| <i>Cenarchaeum symbiosum A</i>                     | NS_000189.1 | US DOE Joint Genome Institute                                 | <a href="http://www.mbari.org/">http://www.mbari.org/</a>                                                                                             |
| <i>Cenarchaeum symbiosum B</i>                     | NS_000190.1 | US DOE Joint Genome Institute                                 | <a href="http://www.mbari.org/">http://www.mbari.org/</a>                                                                                             |
| <i>Ferroplasma acidimanus</i>                      | JGI         | US DOE Joint Genome Institute                                 | <a href="http://genome.jgi-psf.org/ferac/ferac.info.html">http://genome.jgi-psf.org/ferac/ferac.info.html</a>                                         |
| <i>Haloarcula marismortui</i> chr I                | NC_006396.1 | Center of Marine Biotechnology                                | <a href="http://zdna2.umbi.umd.edu/">http://zdna2.umbi.umd.edu/</a>                                                                                   |
| <i>Haloarcula marismortui</i> chr II               | NC_006397.1 | Center of Marine Biotechnology                                | <a href="http://zdna2.umbi.umd.edu/">http://zdna2.umbi.umd.edu/</a>                                                                                   |
| <i>Haloarcula marismortui</i> pNG100               | NC_006389.1 | Center of Marine Biotechnology                                | <a href="http://zdna2.umbi.umd.edu/">http://zdna2.umbi.umd.edu/</a>                                                                                   |
| <i>Haloarcula marismortui</i> pNG200               | NC_006390.1 | Center of Marine Biotechnology                                | <a href="http://zdna2.umbi.umd.edu/">http://zdna2.umbi.umd.edu/</a>                                                                                   |
| <i>Haloarcula marismortui</i> pNG300               | NC_006391.1 | Center of Marine Biotechnology                                | <a href="http://zdna2.umbi.umd.edu/">http://zdna2.umbi.umd.edu/</a>                                                                                   |
| <i>Haloarcula marismortui</i> pNG400               | NC_006392.1 | Center of Marine Biotechnology                                | <a href="http://zdna2.umbi.umd.edu/">http://zdna2.umbi.umd.edu/</a>                                                                                   |
| <i>Haloarcula marismortui</i> pNG500               | NC_006393.1 | Center of Marine Biotechnology                                | <a href="http://zdna2.umbi.umd.edu/">http://zdna2.umbi.umd.edu/</a>                                                                                   |
| <i>Haloarcula marismortui</i> pNG600               | NC_006394.1 | Center of Marine Biotechnology                                | <a href="http://zdna2.umbi.umd.edu/">http://zdna2.umbi.umd.edu/</a>                                                                                   |
| <i>Haloarcula marismortui</i> pNG700               | NC_006395.1 | Center of Marine Biotechnology                                | <a href="http://zdna2.umbi.umd.edu/">http://zdna2.umbi.umd.edu/</a>                                                                                   |
| <i>Halobacterium</i> sp.                           | NC_002607.1 | University of Massachusetts-Amherst, University of Washington | <a href="http://zdna2.umbi.umd.edu/~haloweb/">http://zdna2.umbi.umd.edu/~haloweb/</a>                                                                 |
| <i>Halobacterium</i> sp. pNRC100                   | NC_001869.1 | University of Massachusetts-Amherst, University of Washington | <a href="http://zdna2.umbi.umd.edu/~haloweb/">http://zdna2.umbi.umd.edu/~haloweb/</a>                                                                 |
| <i>Halobacterium</i> sp. pNRC200                   | NC_002608.1 | University of Massachusetts-Amherst, University of Washington | <a href="http://zdna2.umbi.umd.edu/~haloweb/">http://zdna2.umbi.umd.edu/~haloweb/</a>                                                                 |
| <i>Haloquadratum walsbyi</i>                       | NC_008212.1 | Max Planck Institute                                          |                                                                                                                                                       |
| <i>Haloquadratum walsbyi</i> PL47                  | NC_008213.1 | Max Planck Institute                                          |                                                                                                                                                       |
| <i>Halorubrum lacusprofundi</i> chr 1              | NC_012029.1 | US DOE Joint Genome Institute                                 | <a href="http://genome.jgi-psf.org/draft_microbes/halla/halla.info.html">http://genome.jgi-psf.org/draft_microbes/halla/halla.info.html</a>           |
| <i>Halorubrum lacusprofundi</i> chr 2              | NC_012028.1 | US DOE Joint Genome Institute                                 | <a href="http://genome.jgi-psf.org/draft_microbes/halla/halla.info.html">http://genome.jgi-psf.org/draft_microbes/halla/halla.info.html</a>           |
| <i>Halorubrum lacusprofundi</i> pHLAC01            | NC_012030.1 | US DOE Joint Genome Institute                                 | <a href="http://genome.jgi-psf.org/draft_microbes/halla/halla.info.html">http://genome.jgi-psf.org/draft_microbes/halla/halla.info.html</a>           |
| <i>Ignicoccus hospitalis</i>                       | NC_009776.1 | US DOE Joint Genome Institute                                 | <a href="http://genome.jgi-psf.org/draft_microbes/ign_k/ign_k.home.html">http://genome.jgi-psf.org/draft_microbes/ign_k/ign_k.home.html</a>           |
| <i>Metallosphaera sedula</i>                       | NC_009440.1 | US DOE Joint Genome Institute                                 | <a href="http://genome.jgi-psf.org/draft_microbes/metse/metse.info.html">http://genome.jgi-psf.org/draft_microbes/metse/metse.info.html</a>           |
| <i>Methanothermobacter thermautotrophicus</i>      | NC_000916.1 | Genome Therapeutics Corporation                               | <a href="http://www.genomecorp.com/">http://www.genomecorp.com/</a>                                                                                   |
| <i>Methanothermobacter thermautotrophicus</i> pFV1 | NC_001336.1 | Agriculture Univ of Wageningen                                |                                                                                                                                                       |

**Suppl. Table 5 (part2 of 3): Sources of genomes (DNA sequence) used in this study.**

| <b>genome/plasmid</b>                                 | <b>NCBI</b>  | <b>Source</b>                                                         | <b>Web reference</b>                                                                                                                                |
|-------------------------------------------------------|--------------|-----------------------------------------------------------------------|-----------------------------------------------------------------------------------------------------------------------------------------------------|
| <i>Methanothermobacter thermautotrophicus</i> pFZ1    | NC_0011337.1 | Agriculture Univ of Wageningen                                        |                                                                                                                                                     |
| <i>Methanothermobacter thermautotrophicus</i> pME2001 | NC_002125.1  | Molekulargenetik FB Biologie Philipps-Universitaet, Marburg           |                                                                                                                                                     |
| <i>Methanothermobacter thermautotrophicus</i> pME2200 | NC_000905.1  | Swiss Federal Institute of Technology, ETH, Institute of Microbiology |                                                                                                                                                     |
| <i>Methanococcus burtonii</i>                         | NC_007955.1  | US DOE Joint Genome Institute                                         | <a href="http://genome.jgi-psf.org/draft_microbes/metbu/metbu.home.html">http://genome.jgi-psf.org/draft_microbes/metbu/metbu.home.html</a>         |
| <i>Methanococcus aeolicus</i>                         | NC_009635.1  | US DOE Joint Genome Institute                                         | <a href="http://genome.jgi-psf.org/finished_microbes/metae/metae.info.html">http://genome.jgi-psf.org/finished_microbes/metae/metae.info.html</a>   |
| <i>Methanocaldococcus jannaschii</i>                  | NC_000909.1  | TIGR                                                                  | <a href="http://www.tigr.org/tigr-scripts/CMR2/GenomePage3.spl?database=arg">http://www.tigr.org/tigr-scripts/CMR2/GenomePage3.spl?database=arg</a> |
| <i>Methanocaldococcus jannaschii</i> extra-chr 1      | NC_001732.1  | TIGR                                                                  | <a href="http://www.tigr.org/tigr-scripts/CMR2/GenomePage3.spl?database=arg">http://www.tigr.org/tigr-scripts/CMR2/GenomePage3.spl?database=arg</a> |
| <i>Methanocaldococcus jannaschii</i> extra-chr 2      | NC_001733.1  | TIGR                                                                  | <a href="http://www.tigr.org/tigr-scripts/CMR2/GenomePage3.spl?database=arg">http://www.tigr.org/tigr-scripts/CMR2/GenomePage3.spl?database=arg</a> |
| <i>Methanococcus maripaludis</i> C5                   | NC_009135.1  | TIGR                                                                  | <a href="http://www.tigr.org/tigr-scripts/CMR2/GenomePage3.spl?database=arg">http://www.tigr.org/tigr-scripts/CMR2/GenomePage3.spl?database=arg</a> |
| <i>Methanococcus maripaludis</i> C6                   | NC_009975.1  | US DOE Joint Genome Institute                                         | <a href="http://genome.jgi-psf.org/draft_microbes/metmc/metmc.info.html">http://genome.jgi-psf.org/draft_microbes/metmc/metmc.info.html</a>         |
| <i>Methanococcus maripaludis</i> C7                   | NC_009637.1  | US DOE Joint Genome Institute                                         | <a href="http://genome.jgi-psf.org/draft_microbes/metm6/metm6.home.html">http://genome.jgi-psf.org/draft_microbes/metm6/metm6.home.html</a>         |
| <i>Methanococcus maripaludis</i> pMMC501              | NC_009136.1  | US DOE Joint Genome Institute                                         | <a href="http://genome.jgi-psf.org/draft_microbes/metm7/metm7.info.html">http://genome.jgi-psf.org/draft_microbes/metm7/metm7.info.html</a>         |
| <i>Methanococcus maripaludis</i> pURB500              | NC_001811.1  | US DOE Joint Genome Institute                                         | <a href="http://genome.jgi-psf.org/draft_microbes/metmc/metmc.info.html">http://genome.jgi-psf.org/draft_microbes/metmc/metmc.info.html</a>         |
| <i>Methanococcus voltae</i>                           | JGI          | University of Georgia                                                 | <a href="http://www.uga.edu/">http://www.uga.edu/</a>                                                                                               |
| <i>Methanococcus</i> sp.                              |              | US DOE Joint Genome Institute                                         | <a href="http://genome.jgi-psf.org/metvo/metvo.info.html">http://genome.jgi-psf.org/metvo/metvo.info.html</a>                                       |
| <i>Methanococcus</i> sp.                              |              | US DOE Joint Genome Institute                                         | <a href="http://genome.jgi-psf.org/">http://genome.jgi-psf.org/</a>                                                                                 |
| <i>Methanococcus</i> sp.                              | NC_008942.1  | US DOE Joint Genome Institute                                         | <a href="http://genome.jgi-psf.org/finished_microbes/metla/home.html">http://genome.jgi-psf.org/finished_microbes/metla/home.html</a>               |
| <i>Methanococcus</i> sp.                              | NC_009051.1  | US DOE Joint Genome Institute                                         | <a href="http://genome.jgi-psf.org/draft_microbes/metma/info.html">http://genome.jgi-psf.org/draft_microbes/metma/info.html</a>                     |
| <i>Methanopyrus kandleri</i>                          | NC_003551.1  | Fidelity Systems                                                      | <a href="http://www.fidelitysystems.com/">http://www.fidelitysystems.com/</a>                                                                       |
| <i>Methanosarcina thermophila</i>                     | NC_008553.1  | US DOE Joint Genome Institute                                         | <a href="http://genome.jgi-psf.org/">http://genome.jgi-psf.org/</a>                                                                                 |
| <i>Methanosarcina acetivorans</i>                     | NC_003552.1  | Broad Institute                                                       | <a href="http://www.broad.mit.edu/annotation/microbes/methanosarcina/">http://www.broad.mit.edu/annotation/microbes/methanosarcina/</a>             |
| <i>Methanosarcina acetivorans</i> pC2A                | NC_002097.1  | University of Illinois, Microbiology                                  |                                                                                                                                                     |
| <i>Methanosarcina barkeri</i> chr 1                   | NC_007355.1  | US DOE Joint Genome Institute                                         | <a href="http://genome.jgi-psf.org/draft_microbes/metba/home.html">http://genome.jgi-psf.org/draft_microbes/metba/home.html</a>                     |
| <i>Methanosarcina barkeri</i> plasmid 1               | NC_007349.1  | US DOE Joint Genome Institute                                         | <a href="http://genome.jgi-psf.org/draft_microbes/metba/home.html">http://genome.jgi-psf.org/draft_microbes/metba/home.html</a>                     |
| <i>Methanosarcina mazei</i>                           | NC_003901.1  | Gottingen Genomics Laboratory                                         | <a href="http://www.g2l.bio.uni-goettingen.de/projects/f_projects.html">http://www.g2l.bio.uni-goettingen.de/projects/f_projects.html</a>           |
| <i>Methanosphaera stadtmanae</i>                      | NC_007681.1  | University of Goettingen                                              | <a href="http://www.g2l.bio.uni-goettingen.de/">http://www.g2l.bio.uni-goettingen.de/</a>                                                           |
| <i>Methanospirillum hungatei</i>                      | NC_007796.1  | US DOE Joint Genome Institute                                         | <a href="http://genome.jgi-psf.org/">http://genome.jgi-psf.org/</a>                                                                                 |
| <i>Nanoarchaeum equitans</i>                          | NC_005213.1  | DIVERSA                                                               | <a href="http://genome.jgi-psf.org/finished_microbes/methu/methu.info.html">http://genome.jgi-psf.org/finished_microbes/methu/methu.info.html</a>   |
| <i>Natronomonas pharaonis</i>                         | NC_007426.1  | Max Planck Institute                                                  | <a href="http://www.diversa.com/">http://www.diversa.com/</a>                                                                                       |
|                                                       |              |                                                                       | <a href="http://www.biochem.mpg.de/oesterhelte/genomics/intro_Napha.html">http://www.biochem.mpg.de/oesterhelte/genomics/intro_Napha.html</a>       |

**Suppl. Table 5 (part 3 of 3): Sources of genomes (DNA sequence) used in this study.**

| <b>genome/plasmid</b>                | <b>NCBI</b> | <b>Source<sup>1</sup></b>                                                      | <b>Web reference</b>                                                                                                                              |
|--------------------------------------|-------------|--------------------------------------------------------------------------------|---------------------------------------------------------------------------------------------------------------------------------------------------|
| <i>Natronomonas pharaonis</i> PL23   | NC_007428.1 | Max Planck Institute                                                           | <a href="http://www.biochem.mpg.de/oesterhelt/genomics/intro_Napha.html">http://www.biochem.mpg.de/oesterhelt/genomics/intro_Napha.html</a>       |
| <i>Natronomonas pharaonis</i> PL131  | NC_007427.1 | Max Planck Institute                                                           | <a href="http://www.biochem.mpg.de/oesterhelt/genomics/intro_Napha.html">http://www.biochem.mpg.de/oesterhelt/genomics/intro_Napha.html</a>       |
| <i>Nitrosopumilus maritimus</i>      | NC_010085.1 | US DOE Joint Genome Institute                                                  | <a href="http://genome.jgi-psf.org/draft_microbes/nitma/nitma.info.html">http://genome.jgi-psf.org/draft_microbes/nitma/nitma.info.html</a>       |
| <i>Picrophilus torridus</i>          | NC_005877.1 | University of Goettingen                                                       | <a href="http://www.g21.bio.uni-goettingen.de/projects/c_proj_pt.html">http://www.g21.bio.uni-goettingen.de/projects/c_proj_pt.html</a>           |
| <i>Pyrobaculum aerophilum</i>        | NC_003364.1 | UCLA/CalTech                                                                   | <a href="http://informa.bio.caltech.edu/proj_summ_pyro.html">http://informa.bio.caltech.edu/proj_summ_pyro.html</a>                               |
| <i>Pyrobaculum arsenaticum</i>       | NC_009376.1 | US DOE Joint Genome Institute                                                  | <a href="http://genome.jgi-psf.org/finished_microbes/pyrar/pyrar.info.html">http://genome.jgi-psf.org/finished_microbes/pyrar/pyrar.info.html</a> |
| <i>Pyrobaculum caldifontis</i>       | NC_009073.1 | US DOE Joint Genome Institute                                                  | <a href="http://genome.jgi-psf.org/finished_microbes/pyrca/pyrca.home.html">http://genome.jgi-psf.org/finished_microbes/pyrca/pyrca.home.html</a> |
| <i>Pyrobaculum islandicum</i>        | NC_008701.1 | US DOE Joint Genome Institute                                                  | <a href="http://genome.jgi-psf.org/draft_microbes/pyris/pyris.info.html">http://genome.jgi-psf.org/draft_microbes/pyris/pyris.info.html</a>       |
| <i>Pyrococcus abyssi</i>             | NC_000868.1 | Genoscope                                                                      | <a href="http://www.genoscope.cns.fr/Pab/">http://www.genoscope.cns.fr/Pab/</a>                                                                   |
| <i>Pyrococcus abyssi</i> pGT5        | NC_001773.1 | Genoscope                                                                      | <a href="http://www.genoscope.cns.fr/Pab/">http://www.genoscope.cns.fr/Pab/</a>                                                                   |
| <i>Pyrococcus furiosus</i>           | NC_003413.1 | Utah Genome Center                                                             | <a href="http://www.genome.utah.edu/">http://www.genome.utah.edu/</a>                                                                             |
| <i>Pyrococcus horikoshii</i>         | NC_000961.1 | NITE                                                                           | <a href="http://www.bio.nite.go.jp/dogan/MicroTop?GENOME_ID=ot3">http://www.bio.nite.go.jp/dogan/MicroTop?GENOME_ID=ot3</a>                       |
| <i>Staphylothermus marinus</i>       | NC_009033.1 | US DOE Joint Genome Institute                                                  | <a href="http://genome.jgi-psf.org/finished_microbes/stama/stama.info.html">http://genome.jgi-psf.org/finished_microbes/stama/stama.info.html</a> |
| <i>Sulfolobus acidocaldarius</i>     | NC_007181.1 | Danish Archaea Centre                                                          | <a href="http://dac.molbio.ku.dk/">http://dac.molbio.ku.dk/</a>                                                                                   |
| <i>Sulfolobus solfataricus</i>       | NC_002754.1 | European/Canadian Consortium                                                   | <a href="http://www.w-archbac.u-psud.fr/projects/sulfolobus/">http://www.w-archbac.u-psud.fr/projects/sulfolobus/</a>                             |
| <i>Sulfolobus tokodaii</i>           | NC_005907.1 | University of Naples Federico II, Dipartimento di Chimica Biologica            |                                                                                                                                                   |
| <i>Sulfolobus solfataricus</i> pIT3  | NC_003106.2 | NITE                                                                           | <a href="http://www.bio.nite.go.jp/dogan/MicroTop?GENOME_ID=st_G1">http://www.bio.nite.go.jp/dogan/MicroTop?GENOME_ID=st_G1</a>                   |
| <i>Sulfolobus tokodaii</i>           | NC_006624.1 | Dragon Genomics                                                                | <a href="http://www.schem.kyoto-u.ac.jp/imanaka-lab/genome/index.html">http://www.schem.kyoto-u.ac.jp/imanaka-lab/genome/index.html</a>           |
| <i>Thermococcus kodakaraensis</i>    | NC_008698.1 | US DOE Joint Genome Institute                                                  | <a href="http://genome.jgi-psf.org/draft_microbes/thepe/thepe.info.html">http://genome.jgi-psf.org/draft_microbes/thepe/thepe.info.html</a>       |
| <i>Thermoflum pendens</i>            | NC_008696.1 | US DOE Joint Genome Institute                                                  | <a href="http://genome.jgi-psf.org/draft_microbes/thepe/thepe.info.html">http://genome.jgi-psf.org/draft_microbes/thepe/thepe.info.html</a>       |
| <i>Thermoflum pendens</i> pTPEN01    | NC_002578.1 | Max-Planck-Institute                                                           | <a href="http://genome.jgi-psf.org/draft_microbes/thepe/thepe.info.html">http://genome.jgi-psf.org/draft_microbes/thepe/thepe.info.html</a>       |
| <i>Thermoplasma acidophilum</i>      |             | Tokyo University of Pharmacy and Life Science, Department of Molecular Biology |                                                                                                                                                   |
| <i>Thermoplasma acidophilum</i> pTA1 | NC_008318.1 | National Institute of Advanced Industrial Science and Technology, Japan        |                                                                                                                                                   |
| <i>Thermoplasma volcanium</i>        | NC_002689.2 |                                                                                | <a href="http://www.aist.go.jp/RIODB/archaic/">http://www.aist.go.jp/RIODB/archaic/</a>                                                           |
| <i>Thermoproteus neutrophilus</i>    | NC_010525.1 | US DOE Joint Genome Institute                                                  | <a href="http://genome.jgi-psf.org/draft_microbes/thene/thene.info.html">http://genome.jgi-psf.org/draft_microbes/thene/thene.info.html</a>       |

<sup>1</sup>) Source of data does not necessarily correlate with sequencing centre(s). See individual projects for full acknowledgements of participants.
